# Supplementary material for: Gut Bacterial Metabolite Urolithin A (UA) Mitigates Ca2+ Entry in T Cells by Regulating miR-10a-5p
Source: PubMed Central journal article supplement (PMC6685097; doi:10.3389/fimmu.2019.01737), 2019-07-31
Supplement: Image_1.pdf [file Image_1.pdf]

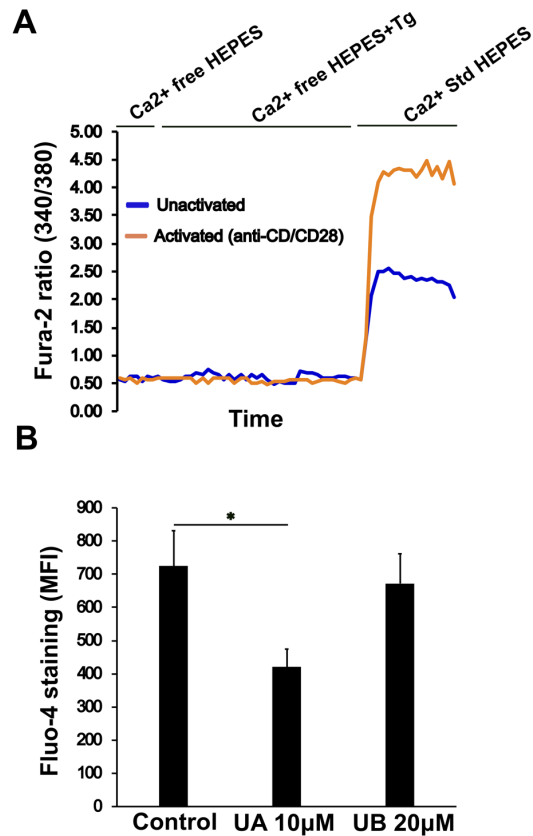

**SUPPL. Fig.1: Urolithins (A and B) treatment decrease Ca<sup>2+</sup> levels in CD4<sup>+</sup> T cells**

- A.** To establish intracellular Ca<sup>2+</sup> measurements by fluorescence imaging, we used inactivated and 3 days activated CD4<sup>+</sup> T cells and measured SOCE as described in materials and method section. As expected, unactivated T cells (blue) have less SOCE over activated T cells (red).
- B.** To test intracellular Ca<sup>2+</sup> levels after treatment with UA or UB, we used a flow cytometry approach and found that UA (10µM) has significant reduction in Ca<sup>2+</sup> levels compared with the control (untreated). However, in the case of UB (20µM) treatment, no statistical significance in reduction of Ca<sup>2+</sup> levels were achieved.
- \*(*p* < 0.05) indicates statistically significant difference using Student's t-test.
